# Supplementary material for: A mutation in the methionine aminopeptidase gene provides phage resistance in Streptococcus thermophilus
Source: PubMed Central journal article supplement (PMC6761271; doi:10.1038/s41598-019-49975-4), 2019-09-25

**A mutation in the methionine aminopeptidase gene provides phage resistance in**  
*Streptococcus thermophilus*

Simon J. Labrie<sup>1,2†</sup>, Cas Mosterd<sup>1,2</sup>, Stéphanie Loignon<sup>2,3</sup>, Marie-Ève Dupuis<sup>1,2</sup>,  
Philippe Desjardins<sup>1</sup>, Geneviève M. Rousseau<sup>1,2</sup>, Denise M. Tremblay<sup>2,3</sup> Dennis A. Romero<sup>4</sup>,  
Philippe Horvath<sup>5</sup>, Christophe Fremaux<sup>5</sup>, and Sylvain Moineau<sup>1,2,3\*</sup>

<sup>1</sup> Département de biochimie, de microbiologie, et de bio-informatique, Faculté des sciences et de génie, Université Laval, Québec City, QC, Canada, G1V 0A6

<sup>2</sup> Groupe de recherche en écologie buccale, Faculté de médecine dentaire, Université Laval, Québec City, QC, Canada, G1V 0A6

<sup>3</sup> Félix d'Hérelle Reference Center for Bacterial Viruses, Faculté de médecine dentaire, Université Laval, Québec City, QC, Canada, G1V 0A6

<sup>4</sup> DuPont Nutrition and Health, 3329 Agriculture Dr, Madison, WI 53716, USA

<sup>5</sup> DuPont Nutrition and Health, BP10, Dangé-Saint-Romain 86220, France

†Current address: SyntBioLab Inc. 4820, rue de la Pascaline, Lévis, Qc, Suite 250, G6W 0L9

\* To whom correspondence should be addressed. Tel: +1 418 656 3712,

Email: [Sylvain.Moineau@bcm.ulaval.ca](mailto:Sylvain.Moineau@bcm.ulaval.ca)

**Table S1. List of primers**

| Primer      | Sequence 5'-3'                                                     | Function                                             | Ref        |
|-------------|--------------------------------------------------------------------|------------------------------------------------------|------------|
| SJL128      | TCAATCTACTCAAGGTATGAATCA                                           | Natural transformation of <i>metAP</i>               | This study |
| SJL130      | GTCAGTAGTAGTGGTCAAGA                                               | Natural transformation of <i>metAP</i>               | This study |
| SJL150      | AGTTCCTGATAGGTCGCATT                                               | Detection of the mutation in <i>metAP</i>            | This study |
| SJL151      | GAGTTGGACCAACAATGCAG                                               | Detection of the mutation in <i>metAP</i>            | This study |
| SJL154      | <u>CAGCAGCGGCCTGGTGCCGCGCGGCAGCCAAATGAT</u><br>TACTGAAATCAGCACGTG  | Cloning <i>metAP</i> in pNZ123                       | This study |
| SJL155      | <u>GCCGGATCTCAGTGGTGGTGGTGGTGCTTAATAA</u><br>GTTCTTCTTCCCCTTGAG    | Cloning <i>metAP</i> in pNZ123                       | This study |
| SJL160      | <u>ATTACAGCTCCAGATCCAGTACTGAATTCTTGAGCCT</u><br>GCTATGATTGACTCTGCA | Cloning the mutated <i>S. mutans metAP</i> in pNZ123 | This study |
| SJL161      | ATTGGGTTCTTCCTGCATGGTTGG                                           | Cloning the mutated <i>S. mutans metAP</i> in pNZ123 | This study |
| SJL162      | CCAACCATGCAGGAAGAACCCAAT                                           | Cloning the mutated <i>S. mutans metAP</i> in pNZ123 | This study |
| SJL163      | <u>GAAAATATGCACTCGAGAAGCTTGAGCTCTCCGAAG</u><br>GTGGACAACATAATAGC   | Cloning the mutated <i>S. mutans metAP</i> in pNZ123 | This study |
| CM_145      | <u>GAATTCGAATTCAAAGGCTGTTGTGACAGCAA</u>                            | Cloning the <i>S. mutans metAP</i> in pNZ123         | This study |
| CM_146      | <u>CTCGAGCTCGAGTTAATAAGTCCCTTCTTGACCC</u>                          | Cloning the <i>S. mutans metAP</i> in pNZ123         | This study |
| CR1-fwd     | TGCTGAGACAACCTAGTCTCTC                                             | CR1 locus screening                                  | 32         |
| CR1-revLong | TAAACAGAGCCTCCCTATCC                                               | CR1 locus screening                                  | 32         |
| CR3-fwd     | CTGAGATTAATAGTGCATTACG                                             | CR3 locus screening                                  | 32         |
| CR3-rev     | GCTGGATATTCGTATAACATGTC                                            | CR3 locus screening                                  | 32         |

Underlined nucleotides correspond to either restriction sites or part of the primer sequence complementary to the cloning vector.



Figure S1. Frequency of the BIMs naturally transformed A) without DNA, B) with MetAP<sup>H206Q</sup> or C) with a MetAP obtain following an error prone PCR.

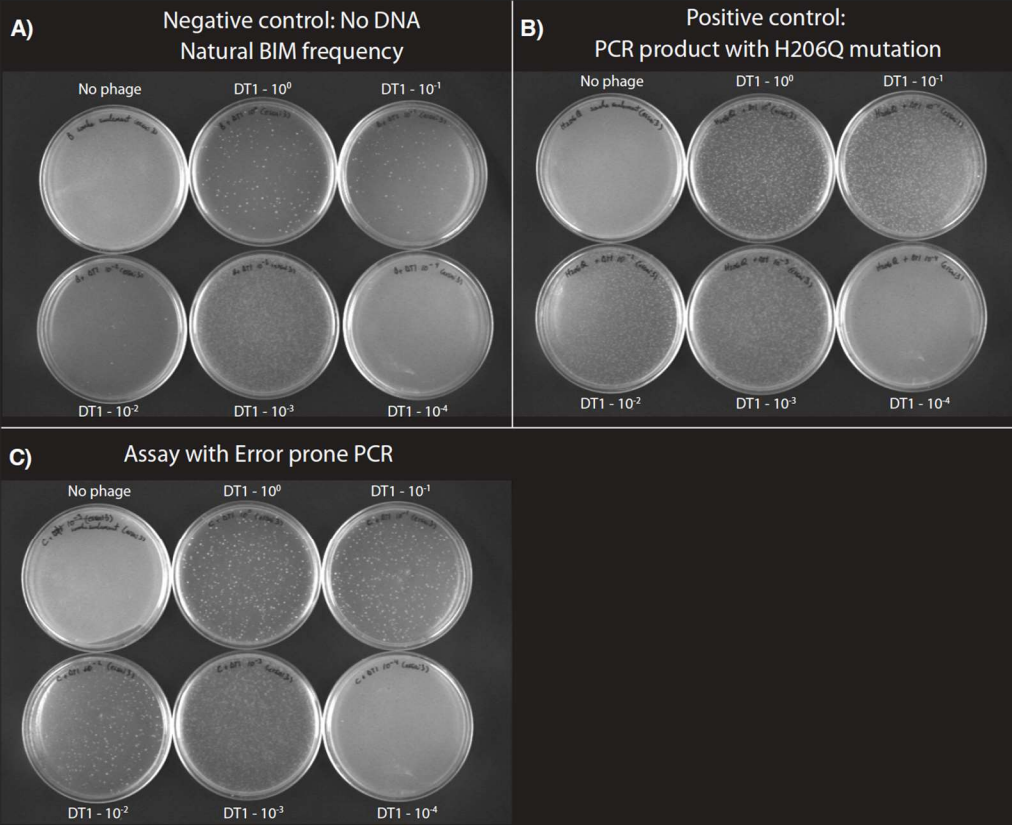

Supplement: 41598_2019_49975_MOESM1_ESM.pdf [file 41598_2019_49975_MOESM1_ESM.pdf]
